# Supplementary material for: Fluorescent characteristics of dissolved organic matter released from biochar and paddy soil incorporated with biochar
Source: Royal Society of Chemistry journal article supplement (doi:10.1039/c9ra10279e), 2020-01-01
Supplement: c9ra10279e1.pdf [file c9ra10279e1.pdf]

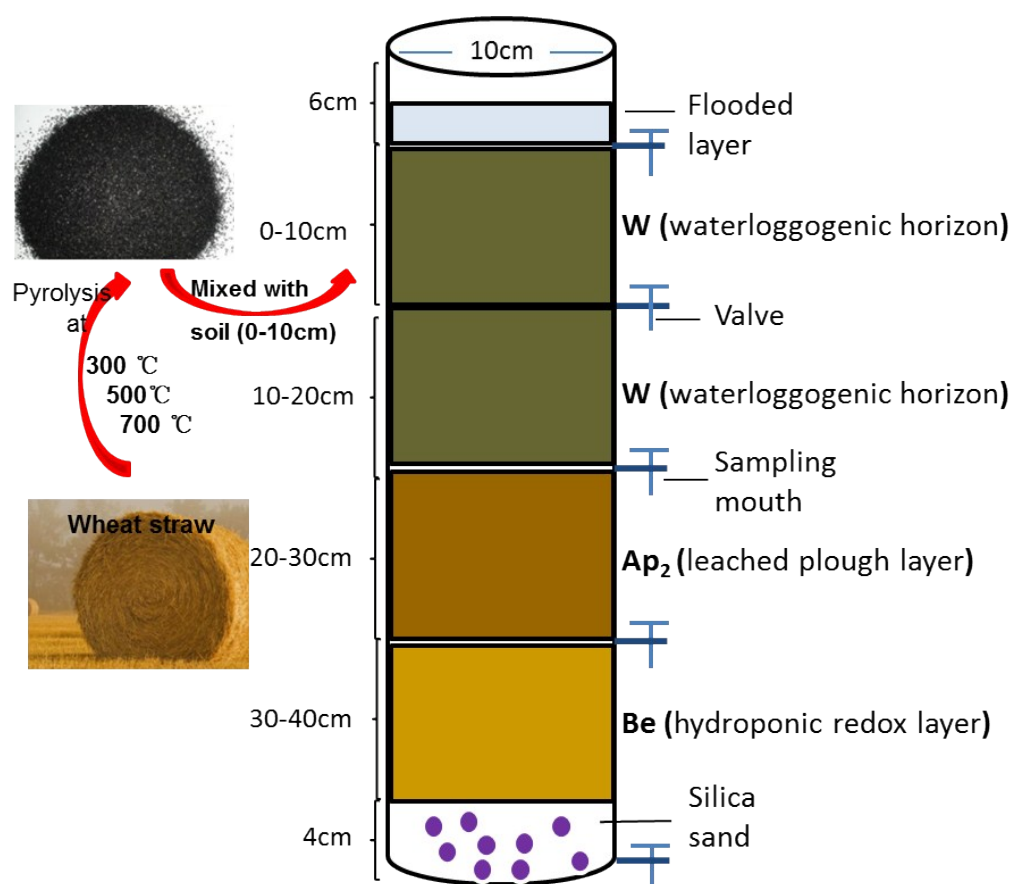

Figure S1 Diagram of soil column experimental design (Column height: 50cm, Inner diameter: 10cm). Different pyrolysis wheat straw biochar combined with fertilizer level was mixed with 0-10cm soil layer (i.e. CK: control treatment without biochar and fertilizer; CF: conventional fertilizer applied; RF: reduce 20% fertilizer compared with CF; FBC300: 300°C biochar combined with RF; FBC500: 500°C biochar combined with RF; FBC700: 700°C biochar combined with RF). Silica sands were placed at the bottom to keep column aeration, and unwoven was twined at inward sampling mouth to against blocking.

Table S1 Characteristics of the profile (0-40cm) soils filled in column in the present study

| Soil profile | pH          | SOM (g kg <sup>-1</sup> ) | AK (mg kg <sup>-1</sup> ) | AP (mg kg <sup>-1</sup> )   | CEC (cmol kg <sup>-1</sup> ) | TN (g kg <sup>-1</sup> ) |
|--------------|-------------|---------------------------|---------------------------|-----------------------------|------------------------------|--------------------------|
| 0-10cm       | 7.38±0.21b  | 32.22±0.44a               | 134.40±1.39a              | 20.12±0.62a                 | 18.62±0.26a                  | 1.21±0.13a               |
| 10-20cm      | 7.59±0.13ab | 24.58±0.52b               | 59.10±5.03b               | 13.80±1.81b                 | 20.18±2.80a                  | 1.24±0.17a               |
| 20-30cm      | 7.63±0.03a  | 10.97±1.10c               | 39.61±1.00c               | 7.55±0.38c                  | 19.87±3.60a                  | 0.39±0.06b               |
| 30-40cm      | 7.72±0.03a  | 6.53±0.43d                | 38.23±1.12c               | 5.66±0.48c                  | 18.31±1.30a                  | 0.26±0.05b               |
| BC type      | pH          | DOC(g kg <sup>-1</sup> )  | Ec(us cm <sup>-1</sup> )  | CEC(cmol kg <sup>-1</sup> ) | TC (%)                       | TN (%)                   |
| BC300        | 10.13±0.07c | 1.14±0.04b                | 315±2.00c                 | 74.67±1.16a                 | 59.46±0.83b                  | 1.07±0.01a               |
| BC500        | 10.47±0.07b | 0.61±0.09c                | 422±2.01a                 | 54.37±0.84b                 | 62.63±1.08a                  | 0.96±0.01b               |
| BC700        | 10.86±0.04a | 1.45±0.05a                | 400±2.52b                 | 35.66±1.05c                 | 60.88±1.06ab                 | 1.08±0.00a               |

Indicates: SOM: soil organic matter; AK: available potassium; AP: available phosphorus; CEC: cation exchange capacity; TN: total nitrogen; TC: total carbon; DOC: dissolved organic carbon; Ec: electrical conductivity; BC300, BC500 and BC700 represent wheat straw biochar produced at 300 °C, 500 °C and 700 °C, respectively. Different letters indicate statistical differences between different treatments ( $p < 0.05$ ).
